# Supplementary material for: Identification of a Novel lincRNA-p21-miR-181b-PTEN Signaling Cascade in Liver Fibrosis
Source: Hindawi journal article supplement (doi:10.1155/2016/9856538), 2016-01-01

A

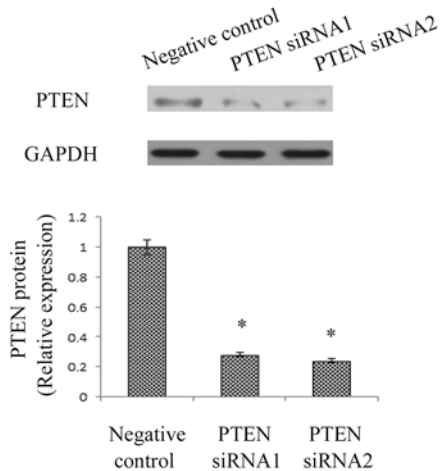

B

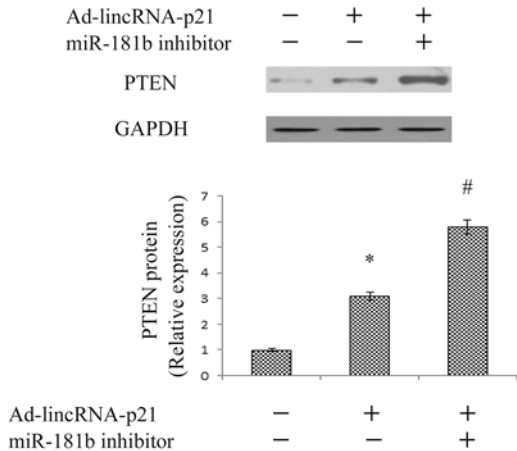

Supplement: f1 [file 9856538.f1.pdf]
